# Supplementary material
Source: PubMed Central journal article supplement (PMC3525314)
Supplement: supp_WNL.0b013e318271f823_hormone_therapy_due_11.6.pdf [file supp_WNL.0b013e318271f823_hormone_therapy_due_11.6.pdf]

## Hormone therapy and Alzheimer disease dementia: New findings from the Cache County Study

المعالجة الهرمونية التعويضية و الخرف الشيخي (الزهايمر)  
: نتائج جديدة مستخلصة من دراسة مقاطعة كاشي

[الهدف من الدراسة : تقترح الدراسات المعتمدة على الملاحظة أن المعالجة الهرمونية تنقص خطر حدوث الخرف الشيخي (ألزهايمر) على خلاف التجارب التي أظهرت زيادة في خطر حدوث المرض. قمنا بدراسة إذا ما كانت العلاقة بين التعويض الهرموني و الخرف الشيخي تتغير باختلاف نوع التعويض الهرموني و مدته.

الوسائل: شملت الدراسة المعتمدة على سكان مقاطعة كاشي 1768 امرأة بين عامي 1995 و 2006 و الذين تمت معرفة معطيات مفصلة عن عمر انقطاع الطمث و استخدام علاج التعويض الهرموني. حدث مرض ألزهايمر عند 176 امرأة خلال هذه الفترة. استخدم نموذج كوكس النسبي الإحصائي لتحديد خطر الترافق بين مرض ألزهايمر و استعمال علاج التعويض الهرموني بشكل مجمل و نسبي متعلق بزمن بدء العلاج، مدته، و نوعه (معاكس أو غير معاكس).

النتائج: ترافق استخدام علاج التعويض الهرموني خلال خمس سنوات من حدوث انقطاع الطمث مع خطر أقل بمقدار 30% لحدوث مرض ألزهايمر (مسافة ثقة 95% 0.49-0.99) و خاصة إذا ما دام هذا الاستخدام لعشر سنوات أو أكثر. على شكل مغاير، لم يترافق استخدام علاج التعويض الهرموني بعد خمس سنوات أو أكثر من حدوث انقطاع الطمث مع تناقص في خطر حدوث مرض ألزهايمر. بل على العكس من ذلك، فإن معدلات المرض تزايدت عند الذين بدؤوا العلاج المعاكس (مركبات الاستروجين-بروجسترون) خلال ثلاث سنوات سابقة لدراسة مقاطعة كاشي (نسبة الخطر المعدل 1.93، 95% مسافة ثقة 0.94-3.96). تتوافق نسبة الخطر الأخيرة مع تلك المشاهدة في التجارب العشوائية للمشاركين بالعلاج المعاكس 2.05.

الاستنتاج : قد يتعلق خطر حدوث مرض ألزهايمر بتوقيت العلاج بالتعويض الهرموني. إن بدء العلاج ضمن فترة حرجة بالقرب من توقيت انقطاع الطمث قد يكون مفيداً. لكن بدء العلاج بفترة متأخرة من الحياة قد يترافق مع زيادة في حدوث المرض (خاصة عند استخدام المركبات المعاكسة). يستحق توقيت البدء بالعلاج الهرموني المعوض و نوعه دراسة أعمق.

**Objectives:** Observational studies suggest reduced risk of Alzheimer disease (AD) in users of hormone therapy (HT), but trials show higher risk. We examined whether the association of HT with AD varies with timing or type of HT use.

**Methods:** Between 1995 and 2006, the population-based Cache County Study followed 1,768 women who had provided a detailed history on age at menopause and use of HT. During this interval, 176 women developed incident AD. Cox proportional hazard models evaluated the association of HT use with AD, overall and in relation to timing, duration of use, and type (opposed vs unopposed) of HT.

**Results:** Women who used any type of HT within 5 years of menopause had 30% less risk of AD (95% confidence interval 0.49–0.99), especially if use was for 10 or more years. By contrast, AD risk was not reduced among those who had initiated HT 5 or more years after menopause. Instead, rates were increased among those who began “opposed” estrogen–progestin compounds within the 3 years preceding the Cache County Study baseline (adjusted hazard ratio 1.93; 95% confidence interval 0.94–3.96). This last hazard ratio was similar to the ratio of 2.05 reported in randomized trial participants assigned to opposed HT.

**Conclusions:** Association of HT use and risk of AD may depend on timing of use. Although possibly beneficial if taken during a critical window near menopause, HT (especially opposed compounds) initiated in later life may be associated with increased risk. The relation of AD risk to timing and type of HT deserves further study.

---

**Translator:** Yousef Hannawi, MD, Department of Neurology, Baylor College of Medicine, Houston, TX  
**Translation Reviewer:** Mohamed Kazamel MD, Department of Neurology, University of Alabama at Birmingham
