# Supplementary material
Source: PubMed Central journal article supplement (PMC3525314)
Supplement: supp_WNL.0b013e318271f823_shao.pdf [file supp_WNL.0b013e318271f823_shao.pdf]

# 호르몬 치료와 알츠하이머 치매

캐시카운티 연구의 새로운 발견

Hormone therapy and Alzheimer disease dementia

New findings from the Cache County Study

Huiibo Shao, MS  
John C.S. Breitner, MD  
Rachel A. Whitmer, PhD  
Junmin Wang, PhD  
Kathleen Hayden, PhD  
Heidi Wengreen, PhD  
Chris Corcoran, PhD  
JoAnn Tschanz, PhD  
Maria Norton, PhD  
Ron Munger, PhD  
Kathleen Welsh-Bohmer, PhD  
Peter P. Zandi, PhD  
For the Cache County  
Investigators

**목적:** 호르몬 치료(hormone therapy, HT)를 받는 경우 알츠하이머병(Alzheimer disease, AD)의 위험이 감소한다고 제시되고 있다. 본 연구는 HT와 AD의 관계에 있어서, 특히 호르몬 치료의 종류나 시기에 따라 영향이 있는지 평가하고자 하였다.

**방법:** 1995년부터 2006년 인구기반 캐시카운티 연구에서 폐경 나이와 호르몬 치료 병력이 있는 1,768명의 여성을 추적관찰 하였다. 이 기간 동안 176명의 여성에서 AD가 발병하였고, Cox 비례위험모형으로 HT사용과 AD의 관계를 전반적으로 평가하였다. 또한 호르몬 치료시기, 사용기간과 종류와의 관계를 분석하였다.

**결과:** 폐경 후 5년 이내에 어떤 종류의 호르몬 치료라도 받은 여성이 AD의 위험도가 30% 낮게 나타났으며(95% CI 0.49~0.99), 특히 10년 이상 치료한 경우 더 그러하였다. 이와 대조적으로 폐경 5년 이후 호르몬 치료를 시작한 여성에서는 AD의 위험도가 감소하지 않았다. 캐시카운티 연구의 기준점보다 앞선 3년 이내에 estrogen-progestin 복합호르몬 치료를 시작한 사람들은 위험도가 증가되어 있었다(수정 HR 1.93; 95% CI 0.94~3.96). 이 위험도는 복합호르몬 치료를 하는 참가자들로 구성된 무작위시험에서 보고된 2.05와 유사한 비율이다.

**결론:** HT 사용과 AD의 위험도와의 관계는 HT를 사용하는 시기에 의해 결정되는 듯하다. 폐경에 가까운 기간에 투여되는 HT는 이점이 있을 수 있지만, 만년에 HT(특히 복합성분)를 시작하는 것은 위험도를 증가시킬 수 있다. AD 위험도와 HT의 시기 및 종류와의 관계에 대해서는 더 많은 연구가 필요하다.

Neurology® 2012;79:1846-1852

**Table 2** Cox proportional hazard models of association with incident AD by timing, duration, and type of HT

|                                                          | No. <sup>a</sup> | P-Y   | AD | HR (95% CI)                   |                               |                               |
|----------------------------------------------------------|------------------|-------|----|-------------------------------|-------------------------------|-------------------------------|
|                                                          |                  |       |    | Crude                         | Adjusted 1 <sup>b</sup>       | Adjusted 2 <sup>c</sup>       |
| <b>Model 1</b>                                           |                  |       |    |                               |                               |                               |
| No HT                                                    | 663              | 4,577 | 89 | 1.0                           | 1.0                           | 1.0                           |
| Any HT                                                   | 1,105            | 8,435 | 87 | 0.78 (0.58-1.06)              | 0.78 (0.57-1.06)              | 0.80 (0.58-1.09)              |
| <b>Model 2</b>                                           |                  |       |    |                               |                               |                               |
| No HT                                                    | 663              | 4,577 | 89 | 1.0                           | 1.0                           | 1.0                           |
| HT (any type) initiated within 5 y of menopause          | 727              | 5,541 | 52 | 0.69 (0.49-0.98) <sup>d</sup> | 0.69 (0.49-0.98) <sup>d</sup> | 0.70 (0.49-0.99) <sup>d</sup> |
| HT initiated >5 y after menopause                        | 378              | 2,893 | 35 | 0.98 (0.66-1.46)              | 0.96 (0.64-1.43)              | 1.03 (0.68-1.55)              |
| <b>Model 3</b>                                           |                  |       |    |                               |                               |                               |
| No HT                                                    | 663              | 4,577 | 89 | 1.0                           | 1.0                           | 1.0                           |
| HT (any type) initiated within 5 y of menopause for <3 y | 170              | 1,223 | 13 | 0.68 (0.38-1.22)              | 0.71 (0.40-1.28)              | 0.71 (0.39-1.28)              |
| HT initiated within 5 y of menopause for 3-10 y          | 80               | 645   | 6  | 0.72 (0.31-1.65)              | 0.71 (0.31-1.63)              | 0.71 (0.31-1.65)              |
| HT initiated within 5 y of menopause for ≥10 y           | 452              | 3,513 | 29 | 0.67 (0.44-1.03)              | 0.64 (0.42-0.99) <sup>d</sup> | 0.63 (0.41-0.98) <sup>d</sup> |
| HT initiated >5 y after menopause for <3 y               | 122              | 966   | 11 | 1.05 (0.56-1.99)              | 0.97 (0.51-1.84)              | 1.04 (0.54-1.97)              |
| HT initiated >5 y after menopause for 3-10 y             | 104              | 820   | 8  | 0.90 (0.44-1.88)              | 0.90 (0.43-1.87)              | 0.92 (0.44-1.92)              |
| HT initiated >5 y after menopause for ≥10 y              | 114              | 842   | 11 | 0.92 (0.49-1.73)              | 0.92 (0.49-1.73)              | 1.00 (0.53-1.91)              |
| <b>Model 4</b>                                           |                  |       |    |                               |                               |                               |
| No HT                                                    | 663              | 4,577 | 89 | 1.0                           | 1.0                           | 1.0                           |
| Any unopposed HT                                         | 660              | 4,908 | 49 | 0.66 (0.46-0.93) <sup>d</sup> | 0.68 (0.48-0.98) <sup>d</sup> | 0.70 (0.49-1.01)              |
| Any opposed HT                                           | 409              | 3,264 | 32 | 0.99 (0.65-1.51)              | 0.90 (0.59-1.39)              | 0.93 (0.60-1.43)              |
| <b>Model 5</b>                                           |                  |       |    |                               |                               |                               |
| No HT                                                    | 663              | 4,577 | 89 | 1.0                           | 1.0                           | 1.0                           |
| Unopposed HT initiated within 5 y of menopause           | 472              | 3,524 | 34 | 0.62 (0.42-0.92) <sup>d</sup> | 0.65 (0.43-0.97) <sup>d</sup> | 0.65 (0.43-0.98) <sup>d</sup> |
| Unopposed HT initiated >5 y after menopause              | 188              | 1,384 | 15 | 0.76 (0.44-1.32)              | 0.79 (0.46-1.38)              | 0.86 (0.49-1.51)              |
| Opposed HT initiated within 5 y of menopause             | 232              | 1,852 | 13 | 0.72 (0.40-1.30)              | 0.65 (0.36-1.19)              | 0.65 (0.36-1.18)              |
| Opposed HT initiated >5 y after menopause                | 177              | 1,412 | 19 | 1.34 (0.80-2.22)              | 1.23 (0.74-2.07)              | 1.32 (0.78-2.24)              |
| <b>Model 6<sup>e</sup></b>                               |                  |       |    |                               |                               |                               |
| No HT                                                    | 663              | 4,577 | 89 | 1.0                           | 1.0                           | 1.0                           |
| Unopposed HT initiated within 5 y of menopause           | 472              | 3,524 | 34 | 0.62 (0.42-0.92) <sup>d</sup> | 0.65 (0.43-0.97) <sup>d</sup> | 0.65 (0.43-0.98) <sup>d</sup> |
| Opposed HT initiated within 5 y of menopause             | 231              | 1,840 | 13 | 0.73 (0.40-1.31)              | 0.65 (0.36-1.19)              | 0.65 (0.36-1.18)              |
| Unopposed HT initiated >3 y before baseline              | 131              | 991   | 10 | 0.71 (0.37-1.36)              | 0.75 (0.39-1.46)              | 0.80 (0.41-1.56)              |
| Opposed HT initiated >3 y before baseline                | 115              | 912   | 10 | 1.03 (0.53-2.00)              | 0.99 (0.50-1.93)              | 1.03 (0.52-2.03)              |
| Unopposed HT initiated within 3 y of baseline            | 57               | 392   | 5  | 0.91 (0.37-2.26)              | 0.90 (0.36-2.24)              | 1.02 (0.41-2.54)              |
| Opposed HT initiated within 3 y of baseline              | 63               | 511   | 9  | 2.02 (1.00-4.09) <sup>d</sup> | 1.70 (0.84-3.45)              | 1.93 (0.94-3.96)              |

Abbreviations: AD = Alzheimer disease; CI = confidence interval; HR = hazard ratio; HT = hormone therapy; P-Y = person-years of observation.

<sup>a</sup> The numbers in this column do not add up to 1,768 in all cases because of missing data on timing, duration, or type of HT.

<sup>b</sup> Adjusted for baseline age, APOE status (ε4 vs no ε4), and years of education.

<sup>c</sup> Adjusted for baseline age, APOE status, years of education, and decile propensity score (see Methods).

<sup>d</sup> Statistically significant at  $p < 0.05$ .

<sup>e</sup> Model 6 categorizes HT use into mutually exclusive groups of those who initiated HT within 5 years of menopause, those who did not initiate HT within 5 years of menopause but did so >3 years before baseline, and those who did not initiate HT within 5 years of menopause but did so within 3 years of baseline. The latter group captures risk associated with recent initiation of HT.
